# Supplementary material for: ATR kinase activation in G1 phase facilitates the repair of ionizing radiation-induced DNA damage
Source: PubMed Central journal article supplement (PMC3905881; doi:10.1093/nar/gkt833), 2013-09-14
Supplement: supp_gkt833_nar-01534-d-2013-File008.pdf [file supp_gkt833_nar-01534-d-2013-File008.pdf]

## ATR kinase activation in G1 phase facilitates the repair of ionizing radiation-induced DNA damage

Armin M. Gamper 1, Reza Rofougaran 1, Simon C. Watkins 2, Joel S. Greenberger 1, Jan H. Beumer 4, Christopher J. Bakkenist 1,3

1 Department of Radiation Oncology, 2 Department of Cell Biology and Physiology, Center for Biologic Imaging, and 3 Department of Pharmacology and Chemical Biology, University of Pittsburgh School of Medicine.

4 Department of Pharmaceutical Sciences, University of Pittsburgh School of Pharmacy.

**Supplementary Table S1.** ATR inhibition has a more potent radiosensitizing effect than ATM inhibition. (A) Clonogenic survival curves were fitted to a Linear Quadratic Model:  $S = \exp(-(\alpha D + \beta D^2))$ , with  $S$  = survival,  $D$  = dose. Calculated  $\alpha$  and  $\beta$  values for cell lines U2OS, H460, 201T, 239T, and Calu6 are shown in Table S1A. (B) Sensitization of cell lines U2OS, H460, 201T, 239T, and Calu6 by 10  $\mu$ M KU55933 or 10  $\mu$ M ETP-46464. Values of the fitted curves were used to calculate the sensitization at 4 and 5 Gy. Table S1B shows average sensitization at 4 and 5 Gy in the various cell lines and their standard deviation.

A

|       |     | alpha    | beta     | alpha   | beta    | alpha     | beta      | alpha       | beta        |
|-------|-----|----------|----------|---------|---------|-----------|-----------|-------------|-------------|
|       |     | no inhib | no inhib | ATM inh | ATM inh | ATR inhib | ATR inhib | ATM+ATR inh | ATM+ATR inh |
| U2OS  | 1st | 0.03566  | 0.03698  | 0.07468 | 0.05869 | 0.3182    | 0.04559   | 0.1465      | 0.1318      |
|       | 2nd | 0.05836  | 0.05083  | 0.169   | 0.06247 | 0.7381    | 0         | 0.4933      | 0.08505     |
|       | 3rd | 0.05731  | 0.03579  | 0.1178  | 0.05402 | 0.2537    | 0.06989   | 0.3001      | 0.1213      |
| H460  | 1st | 0.08844  | 0.01726  | 0.08993 | 0.06415 | 0.4319    | 0.03482   | 0.5669      | 0.07285     |
|       | 2nd | 0.306    | 0.007229 | 0.08375 | 0.09814 | 0.8924    | 0         | 1.025       | 0.05351     |
|       | 3rd | 0        | 0.04366  | 0.06962 | 0.04912 | 0.408     | 0.07758   | 0.5911      | 0.05914     |
| 239T  | 1st | 0.05765  | 0.03131  | 0.2123  | 0.07319 | 0.5849    | 0.04853   | 1.254       | 0           |
|       | 2nd | 0.06907  | 0.01561  | 0.2886  | 0.01682 | 0.2243    | 0.1013    | 0.7145      | 0.06131     |
|       | 3rd | 0.03296  | 0.02076  | 0.1747  | 0.03265 | 0.1758    | 0.1039    | 0.7147      | 0.07147     |
| 201T  | 1st | 0.1202   | 0.01221  | 0.07234 | 0.06343 | 0.3108    | 0.07781   | 0.5004      | 0.07231     |
|       | 2nd | 0.1289   | 0.01277  | 0.06747 | 0.06251 | 0.3213    | 0.08057   | 0.4697      | 0.1237      |
|       | 3rd | 0.1655   | 0.01128  | 0.07693 | 0.06196 | 0.3605    | 0.05314   | 0.4778      | 0.09616     |
| Calu6 | 1st | 0        | 0.01758  | 0.0428  | 0.04059 | 0.07696   | 0.07168   | 0.3366      | 0.1697      |
|       | 2nd | 0.05592  | 0.01382  | 0.06625 | 0.04366 | 0.1402    | 0.04948   | 0.1544      | 0.1256      |
|       | 3rd | 0.08501  | 0.02161  | 0.02423 | 0.08537 | 0.2042    | 0.1368    | 0.5821      | 0.0866      |

**B**

|       |         | 4 Gy        | 5 Gy        | 4 Gy       | 5 Gy       | 4 Gy         | 5 Gy         | 4 Gy           | 5 Gy           |
|-------|---------|-------------|-------------|------------|------------|--------------|--------------|----------------|----------------|
|       |         | no<br>inhib | no<br>inhib | ATM<br>inh | ATM<br>inh | ATR<br>inhib | ATR<br>inhib | ATM+ATR<br>inh | ATM+ATR<br>inh |
| U2OS  | average | 1           | 1           | 1.7450     | 2.1840     | 4.6876       | 6.5842       | 9.1083         | 22.6271        |
|       | stdev   | 0           | 0           | 0.1157     | 0.1249     | 1.7673       | 1.6756       | 1.7567         | 5.2341         |
| H460  | average | 1           | 1           | 1.7775     | 2.6906     | 7.7770       | 14.0864      | 22.4443        | 62.6714        |
|       | stdev   | 0           | 0           | 0.3445     | 0.9246     | 2.2181       | 4.8550       | 12.8652        | 46.6844        |
| 239T  | average | 1           | 1           | 2.7379     | 3.9990     | 8.2934       | 18.7696      | 44.8121        | 122.4984       |
|       | stdev   | 0           | 0           | 0.7874     | 1.8914     | 2.2399       | 2.5832       | 24.2816        | 52.6884        |
| 201T  | average | 1           | 1           | 1.7287     | 2.5544     | 5.5909       | 11.7243      | 16.1972        | 52.6156        |
|       | stdev   | 0           | 0           | 0.1477     | 0.2764     | 1.1584       | 3.6423       | 5.9960         | 31.0199        |
| Calu6 | average | 1           | 1           | 1.8566     | 2.6851     | 5.2951       | 13.9065      | 24.4525        | 109.6696       |
|       | stdev   | 0           | 0           | 0.2763     | 0.8211     | 4.2417       | 15.9772      | 17.7871        | 115.2622       |

## Supplemental Figure legends

**Supplementary Figure S1.** ATR inhibition has a more potent radiosensitizing effect than ATM inhibition. (A) 10  $\mu$ M ETP-46464 or 10  $\mu$ M KU55933 maximally inhibit ATR or ATM respectively. Cell lines U2OS, H460, 201T, and 239T were treated with 2 or 5 Gy and the indicated concentration of ATR or ATM inhibitor. Immunoblots of lysates prepared 75 min following IR are shown for ETP-46464 and KU55933. (B) Sensitization of cell lines U2OS, H460, 201T, 239T, and Calu6 by 10  $\mu$ M ETP-46464 or 10  $\mu$ M KU55933. Clonogenic survival curves were fitted to a Linear Quadratic Model:  $S = \exp(-(\alpha D + \beta D^2))$ , with S = survival, D=dose. (see Supplementary Table 1). Values of the fitted curves were used to calculate the sensitization at 4 and 5 Gy. Graphs show average sensitization at 4 and 5 Gy in the various cell lines and their standard deviation. A Student's t-test was done for a two-tailed distribution of two samples with unequal variances. \*, \*\*, and \*\*\* denote p values smaller than 0.1, 0.05, or 0.01 respectively. (C) Clonogenic survival assays of vehicle, KU55933 and/or Vertex Compound 45 treated cells. Cell lines U2OS, 201T, 239T, Calu6 and H460 were treated for 4.25 h (15 min prior to 4 h post IR) with 10  $\mu$ M KU55933 and/or 10  $\mu$ M Vertex Compound 45.

**Supplementary Figure S2.** Chk1 inhibition for 1 h (+15 to +75 min following IR) does not cause the same effect as ATR inhibition. (A, B) ATR 1 h ATR inhibition post IR is sufficient to radiosensitize cells. Clonogenic survival assays of ATR inhibitor-treated cells. U2OS cells were treated for 1 h (+15 to +75 min following IR) with 10  $\mu$ M ETP-46464 (A) or 10  $\mu$ M Vertex compound 45 (B). (C) Immunoblots of lysates collected at indicated time points from U2OS cells that were mock-treated or treated with 2 Gy of IR and/or the Chk1 inhibitor UCN-01.

**Supplementary Figure S3.** Schematic of the cell synchronization protocol, including FACS profiles, and the protocol for clonogenic survival assays with ATR inhibition from 15 to 75 min post irradiation.

**Supplementary Figure S4.** ATR has a role in the DNA damage response in G1 phase and ATR kinase activity is needed for foci formation or stability. (A) Negative controls for Figure 4D. Images of mock-treated, GFP-ATR expressing U2OS cells (0 Gy) immunostained with antibodies to Cyclin A or geminin. (B) Normalized increase in GFP-ATR foci per cell in asynchronous U2OS cells following IR. GFP-ATR foci 75 min after IR of asynchronous U2OS cells treated for 1 h (+15 to +75 min following IR) with 10  $\mu$ M ETP-46464 were quantitated. The average of GFP-ATR foci per cell were enumerated in 3 independent experiments. Error bars denote standard deviations.

**Supplementary Figure S5.** RPA colocalizes with 53BP1 in G1 phase. Negative controls for Figure 5B. Asynchronous GFP-53BP1 expressing U2OS cells were treated with 2 Gy IR and fixed after 75 min. Cells were co-immunostained with antibodies against RPA2 (detected by anti-mouse-Alexafluor647) and the cell cycle markers geminin or cyclin A (detected by anti-rabbit-Cy3).

**Supplementary Movies.** Live cell imaging of cells with GFP-ATR foci. Movies show U2OS cells stably expressing GFP-ATR that were infected with a virus expressing Cdt1-RFP and irradiated with 10 Gy. The time portrayed by the movie corresponds to 24 h.

A

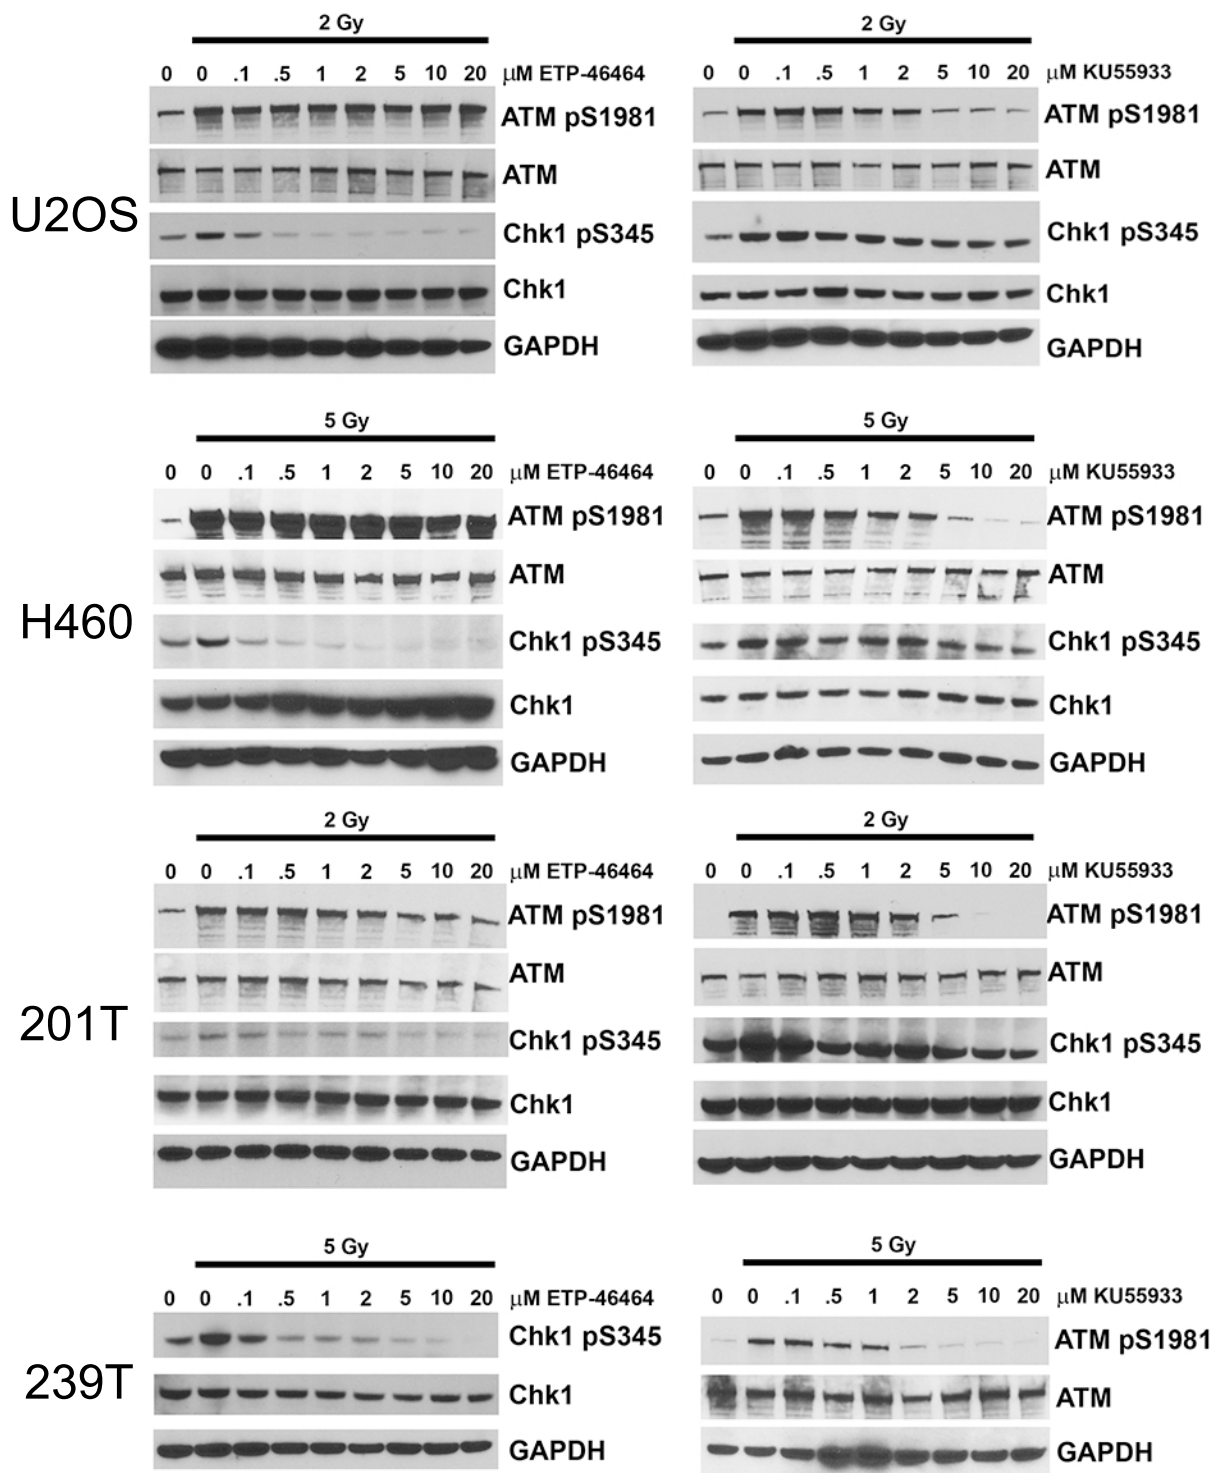

**B****Sensitization in U2OS Cells**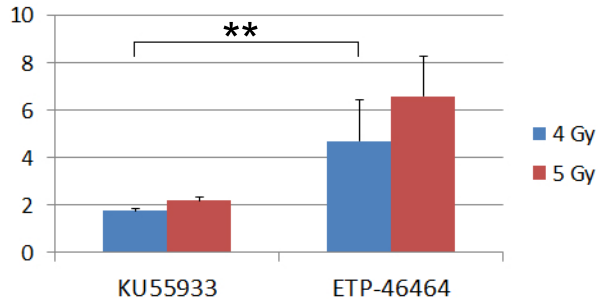**Sensitization in 201T cells**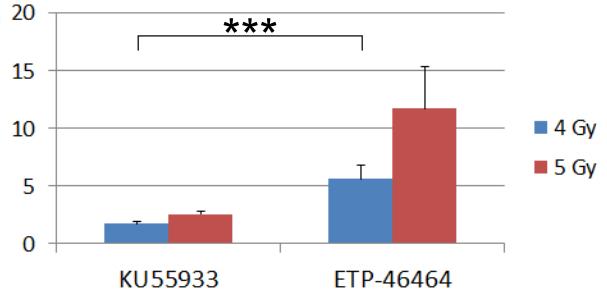**Sensitization in 239T cells**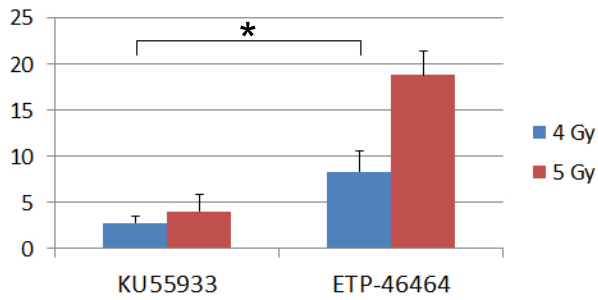**Sensitization in Calu6 cells**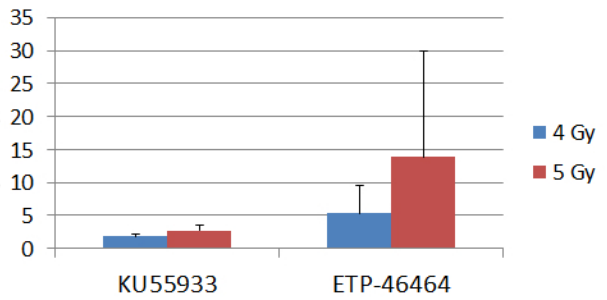**Sensitization in H460 Cells**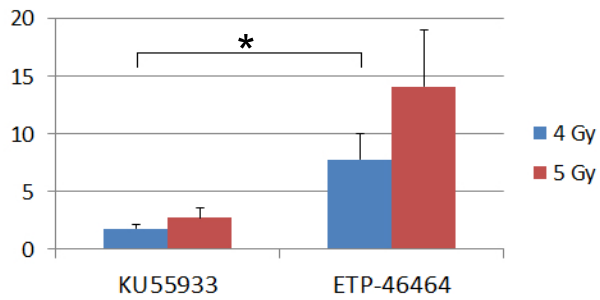

C

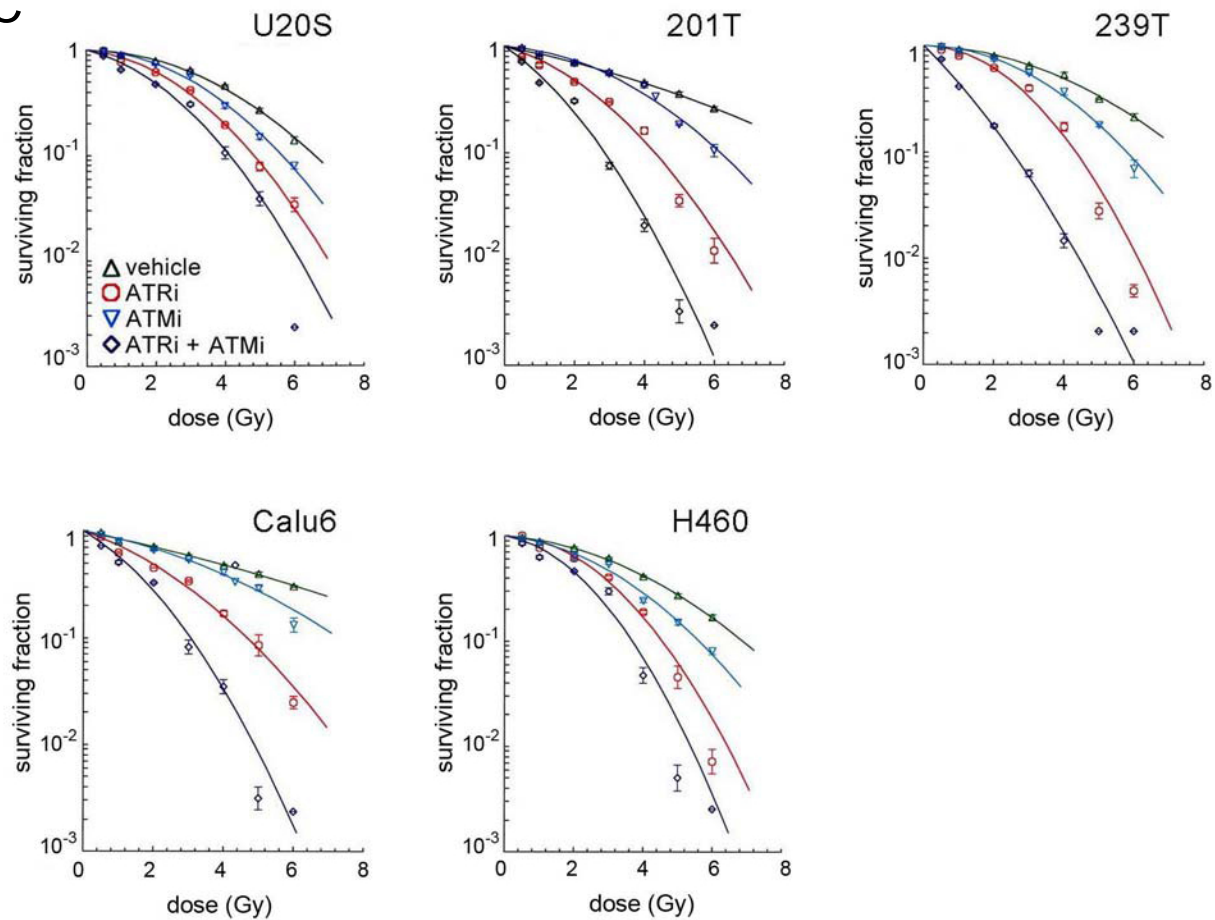

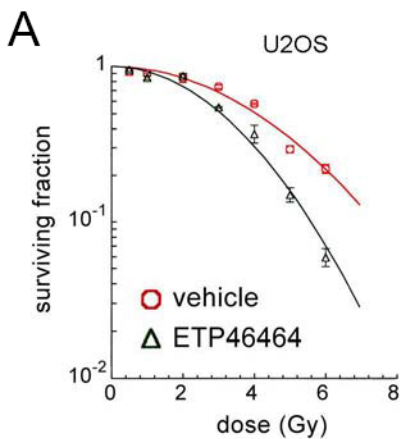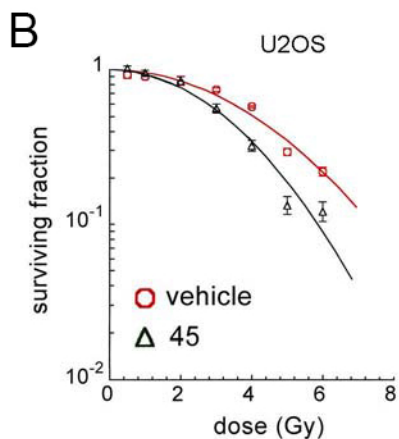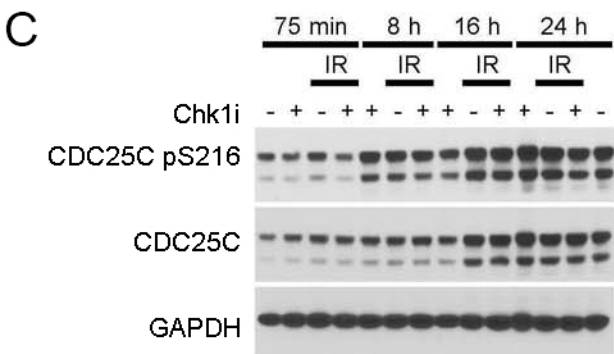

Gamper et al. Supplementary Figure S2



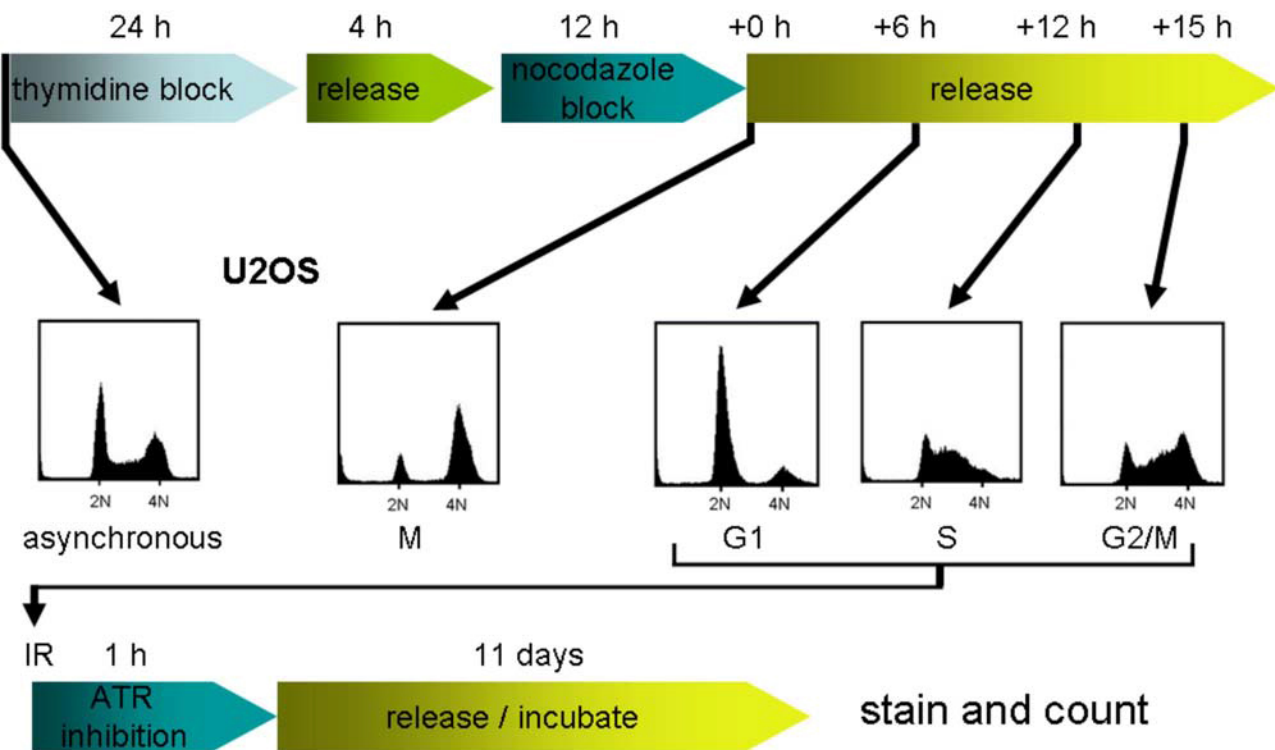

**Gamper et al. Supplementary Figure S3**

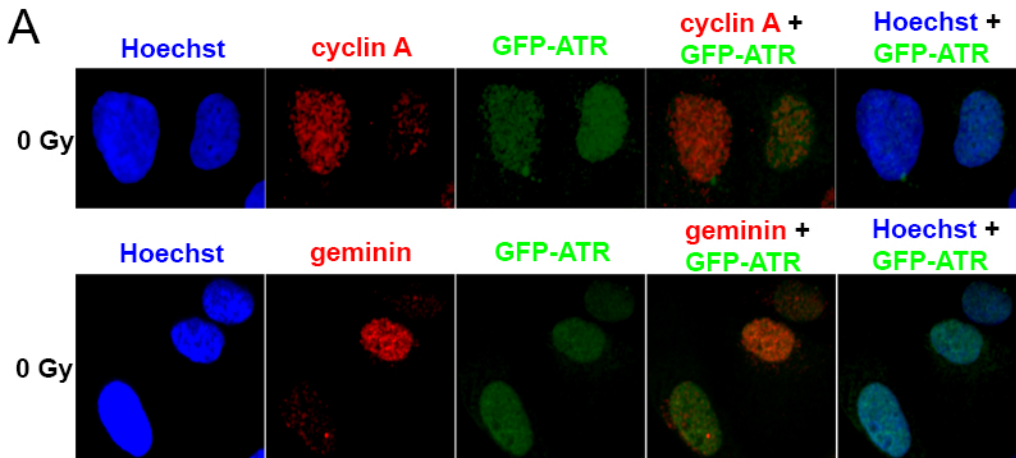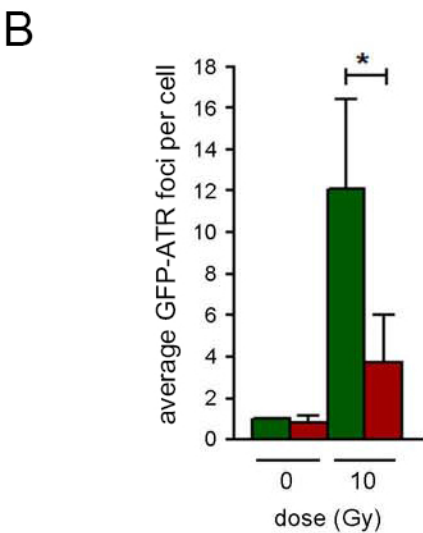

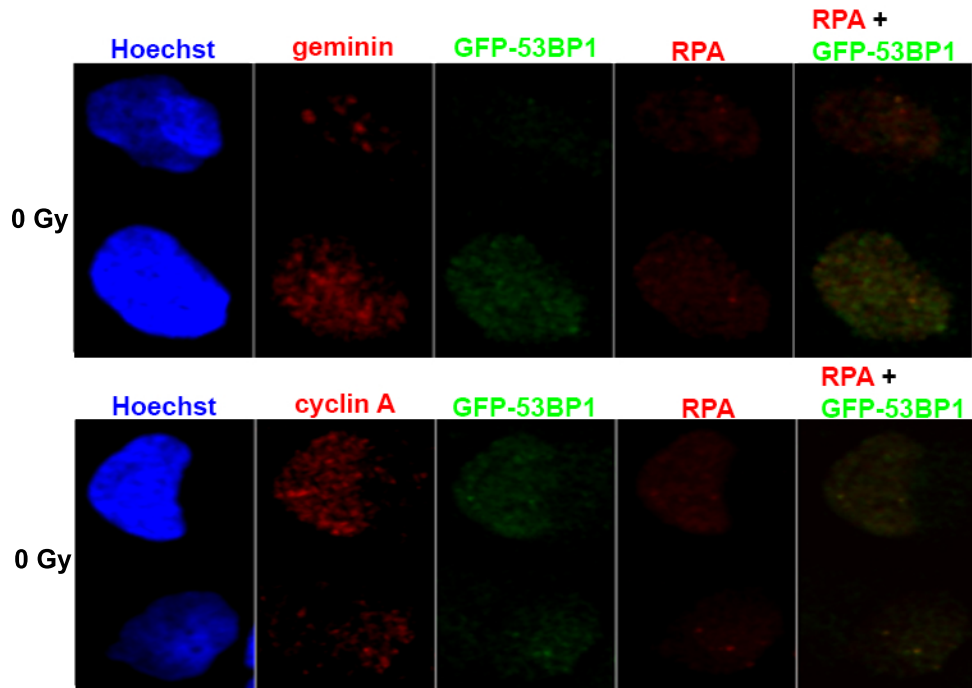

Gamper et al. Suppl. Fig. 5
